# Supplementary material for: Common targetable inflammatory pathways in brain transcriptome of autism spectrum disorders and Tourette syndrome
Source: Frontiers journal article supplement (doi:10.3389/fnins.2022.999346), 2022-12-15

# ASD - Hierarchical clustering analyses

**A**

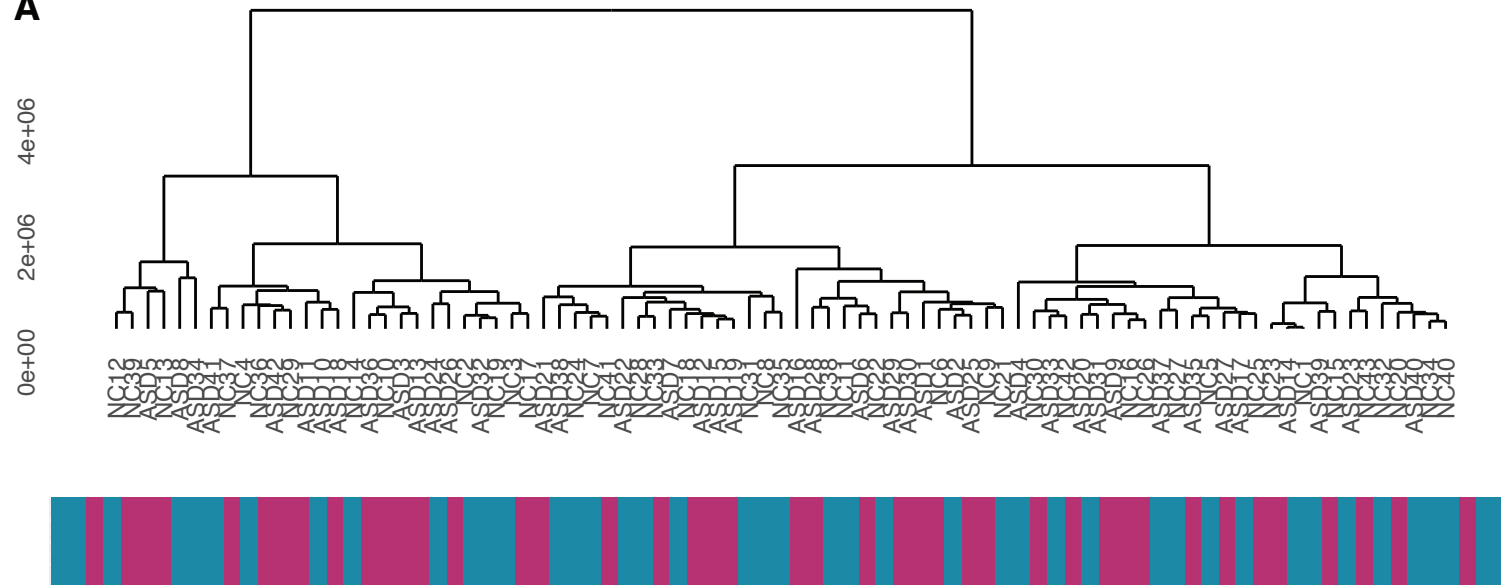

**B**

**Variance Histogram**

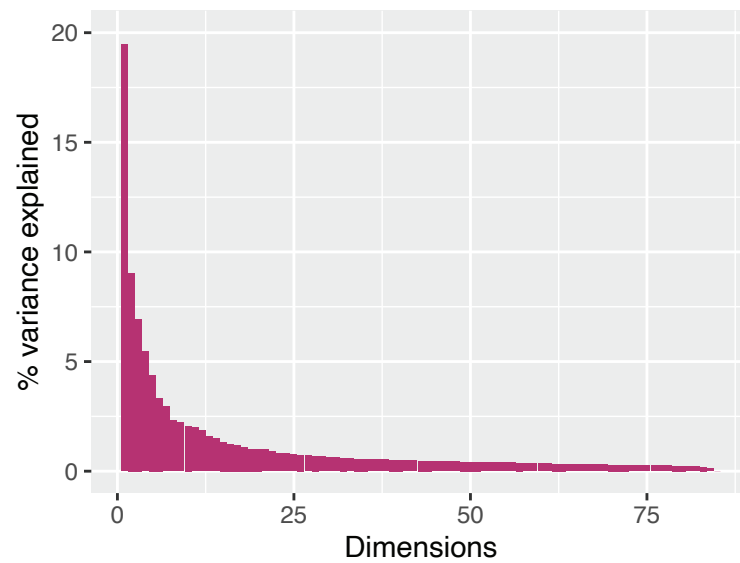

**C**

**Principal Component Analysis**

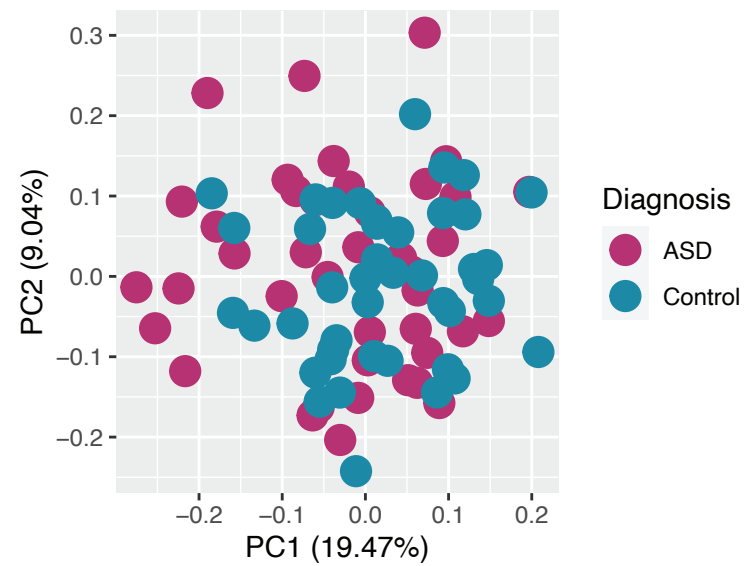

Supplement: Image_1.PDF [file Image_1.PDF]
